# Supplementary material for: Proteogenomic analysis integrated with electronic health records data reveals disease-associated variants in Black Americans
Source: JCI journal article supplement (doi:10.1172/jci181802), 2024-09-24
Supplement: sd1 [file 1]

| <b>NHLBI TOPMed Consortium Member Name</b> | <b>Institution(s)</b>                                           |
|--------------------------------------------|-----------------------------------------------------------------|
| Abe, Namiko                                | New York Genome Center                                          |
| Abecasis, Gonçalo                          | University of Michigan                                          |
| Aguet, Francois                            | Broad Institute                                                 |
| Albert, Christine                          | Cedars Sinai                                                    |
| Almasy, Laura                              | Children's Hospital of Philadelphia, University of Pennsylvania |
| Alonso, Alvaro                             | Emory University                                                |
| Ament, Seth                                | University of Maryland                                          |
| Anderson, Peter                            | University of Washington                                        |
| Anugu, Pramod                              | University of Mississippi                                       |
| Applebaum-Bowden, Deborah                  | National Institutes of Health                                   |
| Ardlie, Kristin                            | Broad Institute                                                 |
| Arking, Dan                                | Johns Hopkins University                                        |
| Arnett, Donna K                            | University of Kentucky                                          |
| Ashley-Koch, Allison                       | Duke University                                                 |
| Aslibekyan, Stella                         | University of Alabama                                           |
| Assimes, Tim                               | Stanford University                                             |
| Auer, Paul                                 | Medical College of Wisconsin                                    |
| Avramopoulos, Dimitrios                    | Johns Hopkins University                                        |
| Ayas, Najib                                | Providence Health Care                                          |
| Balasubramanian, Adithya                   | Baylor College of Medicine Human Genome Sequencing Center       |
| Barnard, John                              | Cleveland Clinic                                                |
| Barnes, Kathleen                           | Tempus, University of Colorado Anschutz Medical Campus          |
| Barr, R. Graham                            | Columbia University                                             |
| Barron-Casella, Emily                      | Johns Hopkins University                                        |
| Barwick, Lucas                             | The Emmes Corporation                                           |
| Beaty, Terri                               | Johns Hopkins University                                        |
| Beck, Gerald                               | Cleveland Clinic                                                |
| Becker, Diane                              | Johns Hopkins University                                        |

|                      |                                                                          |
|----------------------|--------------------------------------------------------------------------|
| Becker, Lewis        | Johns Hopkins University                                                 |
| Beer, Rebecca        | National Heart, Lung, and Blood Institute, National Institutes of Health |
| Beitelshees, Amber   | University of Maryland                                                   |
| Benjamin, Emelia     | Boston University, Massachusetts General Hospital                        |
| Benos, Takis         | University of Pittsburgh                                                 |
| Bezerra, Marcos      | Funda o de Hematologia e Hemoterapia de Pernambuco - Hemope              |
| Bielak, Larry        | University of Michigan                                                   |
| Bis, Joshua          | University of Washington                                                 |
| Blackwell, Thomas    | University of Michigan                                                   |
| Blangero, John       | University of Texas Rio Grande Valley School of Medicine                 |
| Boerwinkle, Eric     | University of Texas Health at Houston                                    |
| Bowden, Donald W.    | Wake Forest Baptist Health                                               |
| Bowler, Russell      | National Jewish Health                                                   |
| Brody, Jennifer      | University of Washington                                                 |
| Broeckel, Ulrich     | Medical College of Wisconsin                                             |
| Broome, Jai          | University of Washington                                                 |
| Brown, Deborah       | University of Texas Health at Houston                                    |
| Bunting, Karen       | New York Genome Center                                                   |
| Burchard, Esteban    | University of California, San Francisco                                  |
| Bustamante, Carlos   | Stanford University                                                      |
| Buth, Erin           | University of Washington                                                 |
| Cade, Brian          | Brigham & Women's Hospital                                               |
| Cardwell, Jonathan   | University of Colorado at Denver                                         |
| Carey, Vincent       | Brigham & Women's Hospital                                               |
| Carrier, Julie       | University of Montreal                                                   |
| Carson, April        | University of Mississippi                                                |
| Carty, Cara          | Washington State University                                              |
| Casaburi, Richard    | University of California, Los Angeles                                    |
| Casas Romero, Juan P | Brigham & Women's Hospital                                               |

|                      |                                                          |
|----------------------|----------------------------------------------------------|
| Casella, James       | Johns Hopkins University                                 |
| Castaldi, Peter      | Brigham & Women's Hospital                               |
| Chaffin, Mark        | Broad Institute                                          |
| Chang, Christy       | University of Maryland                                   |
| Chang, Yi-Cheng      | National Taiwan University                               |
| Chasman, Daniel      | Brigham & Women's Hospital                               |
| Chavan, Sameer       | University of Colorado at Denver                         |
| Chen, Bo-Juen        | New York Genome Center                                   |
| Chen, Wei-Min        | University of Virginia                                   |
| Chen, Yii-Der Ida    | Lundquist Institute                                      |
| Cho, Michael         | Brigham & Women's Hospital                               |
| Choi, Seung Hoan     | Broad Institute                                          |
| Chuang, Lee-Ming     | National Taiwan University                               |
| Chung, Mina          | Cleveland Clinic                                         |
| Chung, Ren-Hua       | National Health Research Institute Taiwan                |
| Clish, Clary         | Broad Institute                                          |
| Comhair, Suzy        | Cleveland Clinic                                         |
| Conomos, Matthew     | University of Washington                                 |
| Cornell, Elaine      | University of Vermont                                    |
| Correa, Adolfo       | University of Mississippi                                |
| Crandall, Carolyn    | University of California, Los Angeles                    |
| Crapo, James         | National Jewish Health                                   |
| Cupples, L. Adrienne | Boston University                                        |
| Curran, Joanne       | University of Texas Rio Grande Valley School of Medicine |
| Curtis, Jeffrey      | University of Michigan                                   |
| Custer, Brian        | Vitalant Research Institute                              |
| Damcott, Coleen      | University of Maryland                                   |
| Darbar, Dawood       | University of Illinois at Chicago                        |
| David, Sean          | University of Chicago                                    |

|                      |                                                           |
|----------------------|-----------------------------------------------------------|
| Davis, Colleen       | University of Washington                                  |
| Daya, Michelle       | University of Colorado at Denver                          |
| de Andrade, Mariza   | Mayo Clinic                                               |
| de las Fuentes, Lisa | Washington University in St Louis                         |
| de Vries, Paul       | University of Texas Health at Houston                     |
| DeBaun, Michael      | Vanderbilt University                                     |
| Deka, Ranjan         | University of Cincinnati                                  |
| DeMeo, Dawn          | Brigham & Women's Hospital                                |
| Devine, Scott        | University of Maryland                                    |
| Dinh, Huyen          | Baylor College of Medicine Human Genome Sequencing Center |
| Doddapaneni, Harsha  | Baylor College of Medicine Human Genome Sequencing Center |
| Duan, Qing           | University of North Carolina                              |
| Dugan-Perez, Shannon | Baylor College of Medicine Human Genome Sequencing Center |
| Duggirala, Ravi      | University of Texas Rio Grande Valley School of Medicine  |
| Durda, Jon Peter     | University of Vermont                                     |
| Dutcher, Susan K.    | Washington University in St Louis                         |
| Eaton, Charles       | Brown University                                          |
| Ekunwe, Lynette      | University of Mississippi                                 |
| El Boueiz, Adel      | Harvard University                                        |
| Ellinor, Patrick     | Massachusetts General Hospital                            |
| Emery, Leslie        | University of Washington                                  |
| Erzurum, Serpil      | Cleveland Clinic                                          |
| Farber, Charles      | University of Virginia                                    |
| Farek, Jesse         | Baylor College of Medicine Human Genome Sequencing Center |
| Fingerlin, Tasha     | National Jewish Health                                    |
| Flickinger, Matthew  | University of Michigan                                    |
| Fornage, Myriam      | University of Texas Health at Houston                     |
| Franceschini, Nora   | University of North Carolina                              |
| Frazar, Chris        | University of Washington                                  |

|                         |                                                                          |
|-------------------------|--------------------------------------------------------------------------|
| Fu, Mao                 | University of Maryland                                                   |
| Fullerton, Stephanie M. | University of Washington                                                 |
| Fulton, Lucinda         | Washington University in St Louis                                        |
| Gabriel, Stacey         | Broad Institute                                                          |
| Gan, Weiniu             | National Heart, Lung, and Blood Institute, National Institutes of Health |
| Gao, Shanshan           | University of Colorado at Denver                                         |
| Gao, Yan                | University of Mississippi                                                |
| Gass, Margery           | Fred Hutchinson Cancer Research Center                                   |
| Geiger, Heather         | New York Genome Center                                                   |
| Gelb, Bruce             | Icahn School of Medicine at Mount Sinai                                  |
| Geraci, Mark            | University of Pittsburgh                                                 |
| Germer, Soren           | New York Genome Center                                                   |
| Gerszten, Robert        | Beth Israel Deaconess Medical Center                                     |
| Ghosh, Auyon            | Brigham & Women's Hospital                                               |
| Gibbs, Richard          | Baylor College of Medicine Human Genome Sequencing Center                |
| Gignoux, Chris          | Stanford University                                                      |
| Gladwin, Mark           | University of Pittsburgh                                                 |
| Glahn, David            | Boston Children's Hospital, Harvard Medical School                       |
| Gogarten, Stephanie     | University of Washington                                                 |
| Gong, Da-Wei            | University of Maryland                                                   |
| Goring, Harald          | University of Texas Rio Grande Valley School of Medicine                 |
| Graw, Sharon            | University of Colorado Anschutz Medical Campus                           |
| Gray, Kathryn J.        | Mass General Brigham                                                     |
| Grine, Daniel           | University of Colorado at Denver                                         |
| Gross, Colin            | University of Michigan                                                   |
| Gu, C. Charles          | Washington University in St Louis                                        |
| Guan, Yue               | University of Maryland                                                   |
| Guo, Xiuqing            | Lundquist Institute                                                      |
| Gupta, Namrata          | Broad Institute                                                          |

|                        |                                                                          |
|------------------------|--------------------------------------------------------------------------|
| Haas, David M.         | Indiana University                                                       |
| Haessler, Jeff         | Fred Hutchinson Cancer Research Center                                   |
| Hall, Michael          | University of Mississippi                                                |
| Han, Yi                | Baylor College of Medicine Human Genome Sequencing Center                |
| Hanly, Patrick         | University of Calgary                                                    |
| Harris, Daniel         | University of Maryland                                                   |
| Hawley, Nicola L.      | Yale University                                                          |
| He, Jiang              | Tulane University                                                        |
| Heavner, Ben           | University of Washington                                                 |
| Heckbert, Susan        | University of Washington                                                 |
| Hernandez, Ryan        | University of California, San Francisco                                  |
| Herrington, David      | Wake Forest Baptist Health                                               |
| Hersh, Craig           | Brigham & Women's Hospital                                               |
| Hidalgo, Bertha        | University of Alabama                                                    |
| Hixson, James          | University of Texas Health at Houston                                    |
| Hobbs, Brian           | Brigham & Women's Hospital                                               |
| Hokanson, John         | University of Colorado at Denver                                         |
| Hong, Elliott          | University of Maryland                                                   |
| Hoth, Karin            | University of Iowa                                                       |
| Hsiung, Chao (Agnes)   | National Health Research Institute Taiwan                                |
| Hu, Jianhong           | Baylor College of Medicine Human Genome Sequencing Center                |
| Hung, Yi-Jen           | Tri-Service General Hospital National Defense Medical Center             |
| Huston, Haley          | Blood Works Northwest                                                    |
| Hwu, Chii Min          | Taichung Veterans General Hospital Taiwan                                |
| Irvin, Marguerite Ryan | University of Alabama                                                    |
| Jackson, Rebecca       | Oklahoma State University Medical Center                                 |
| Jain, Deepti           | University of Washington                                                 |
| Jaquish, Cashell       | National Heart, Lung, and Blood Institute, National Institutes of Health |
| Johnsen, Jill          | Blood Works Northwest                                                    |

|                     |                                                                          |
|---------------------|--------------------------------------------------------------------------|
| Johnson, Andrew     | National Heart, Lung, and Blood Institute, National Institutes of Health |
| Johnson, Craig      | University of Washington                                                 |
| Johnston, Rich      | Emory University                                                         |
| Jones, Kimberly     | Johns Hopkins University                                                 |
| Kang, Hyun Min      | University of Michigan                                                   |
| Kaplan, Robert      | Albert Einstein College of Medicine                                      |
| Kardia, Sharon      | University of Michigan                                                   |
| Kelly, Shannon      | University of California, San Francisco                                  |
| Kenny, Eimear       | Icahn School of Medicine at Mount Sinai                                  |
| Kessler, Michael    | University of Maryland                                                   |
| Khan, Alyna         | University of Washington                                                 |
| Khan, Ziad          | Baylor College of Medicine Human Genome Sequencing Center                |
| Kim, Wonji          | Harvard University                                                       |
| Kimoff, John        | McGill University                                                        |
| Kinney, Greg        | University of Colorado at Denver                                         |
| Konkle, Barbara     | Blood Works Northwest                                                    |
| Kooperberg, Charles | Fred Hutchinson Cancer Research Center                                   |
| Kramer, Holly       | Loyola University                                                        |
| Lange, Christoph    | Harvard School of Public Health                                          |
| Lange, Ethan        | University of Colorado at Denver                                         |
| Lange, Leslie       | University of Colorado at Denver                                         |
| Laurie, Cathy       | University of Washington                                                 |
| Laurie, Cecelia     | University of Washington                                                 |
| LeBoff, Meryl       | Brigham & Women's Hospital                                               |
| Lee, Jiwon          | Brigham & Women's Hospital                                               |
| Lee, Sandra         | Baylor College of Medicine Human Genome Sequencing Center                |
| Lee, Wen-Jane       | Taichung Veterans General Hospital Taiwan                                |
| LeFaive, Jonathon   | University of Michigan                                                   |
| Levine, David       | University of Washington                                                 |

|                      |                                                                          |
|----------------------|--------------------------------------------------------------------------|
| Levy, Dan            | National Heart, Lung, and Blood Institute, National Institutes of Health |
| Lewis, Joshua        | University of Maryland                                                   |
| Li, Xiaohui          | Lundquist Institute                                                      |
| Li, Yun              | University of North Carolina                                             |
| Lin, Henry           | Lundquist Institute                                                      |
| Lin, Honghuang       | Boston University                                                        |
| Lin, Xihong          | Harvard School of Public Health                                          |
| Liu, Simin           | Brown University                                                         |
| Liu, Yongmei         | Duke University                                                          |
| Liu, Yu              | Stanford University                                                      |
| Loos, Ruth J.F.      | Icahn School of Medicine at Mount Sinai                                  |
| Lubitz, Steven       | Massachusetts General Hospital                                           |
| Lunetta, Kathryn     | Boston University                                                        |
| Luo, James           | National Heart, Lung, and Blood Institute, National Institutes of Health |
| Magalang, Ulysses    | Ohio State University                                                    |
| Mahaney, Michael     | University of Texas Rio Grande Valley School of Medicine                 |
| Make, Barry          | Johns Hopkins University                                                 |
| Manichaikul, Ani     | University of Virginia                                                   |
| Manning, Alisa       | Broad Institute, Harvard University, Massachusetts General Hospital      |
| Manson, JoAnn        | Brigham & Women's Hospital                                               |
| Martin, Lisa         | George Washington University                                             |
| Marton, Melissa      | New York Genome Center                                                   |
| Mathai, Susan        | University of Colorado at Denver                                         |
| Mathias, Rasika      | Johns Hopkins University                                                 |
| May, Susanne         | University of Washington                                                 |
| McArdle, Patrick     | University of Maryland                                                   |
| McDonald, Merry-Lynn | University of Alabama                                                    |
| McFarland, Sean      | Harvard University                                                       |
| McGarvey, Stephen    | Brown University                                                         |



|                      |                                                                                         |
|----------------------|-----------------------------------------------------------------------------------------|
| McGoldrick, Daniel   | University of Washington                                                                |
| McHugh, Caitlin      | University of Washington                                                                |
| McNeil, Becky        | RTI International                                                                       |
| Mei, Hao             | University of Mississippi                                                               |
| Meigs, James         | Massachusetts General Hospital                                                          |
| Menon, Vipin         | Baylor College of Medicine Human Genome Sequencing Center                               |
| Mestroni, Luisa      | University of Colorado Anschutz Medical Campus                                          |
| Metcalf, Ginger      | Baylor College of Medicine Human Genome Sequencing Center                               |
| Meyers, Deborah A    | University of Arizona                                                                   |
| Mignot, Emmanuel     | Stanford University                                                                     |
| Mikulla, Julie       | National Heart, Lung, and Blood Institute, National Institutes of Health                |
| Min, Nancy           | University of Mississippi                                                               |
| Minear, Mollie       | National Institute of Child Health and Human Development, National Institutes of Health |
| Minster, Ryan L      | University of Pittsburgh                                                                |
| Mitchell, Braxton D. | University of Maryland                                                                  |
| Moll, Matt           | Brigham & Women's Hospital                                                              |
| Momin, Zeineen       | Baylor College of Medicine Human Genome Sequencing Center                               |
| Montasser, May E.    | University of Maryland                                                                  |
| Montgomery, Courtney | Oklahoma Medical Research Foundation                                                    |
| Muzny, Donna         | Baylor College of Medicine Human Genome Sequencing Center                               |
| Mychaleckyj, Josyf C | University of Virginia                                                                  |
| Nadkarni, Girish     | Icahn School of Medicine at Mount Sinai                                                 |
| Naik, Rakhi          | Johns Hopkins University                                                                |
| Naseri, Take         | Ministry of Health, Government of Samoa                                                 |
| Natarajan, Pradeep   | Broad Institute                                                                         |
| Nekhai, Sergei       | Howard University                                                                       |
| Nelson, Sarah C.     | University of Washington                                                                |
| Neltner, Bonnie      | University of Colorado at Denver                                                        |
| Nessner, Caitlin     | Baylor College of Medicine Human Genome Sequencing Center                               |

|                         |                                                                          |
|-------------------------|--------------------------------------------------------------------------|
| Nickerson, Deborah      | University of Washington                                                 |
| Nkechinyere, Osuji      | Baylor College of Medicine Human Genome Sequencing Center                |
| North, Kari             | University of North Carolina                                             |
| O'Connell, Jeff         | University of Maryland                                                   |
| O'Connor, Tim           | University of Maryland                                                   |
| Ochs-Balcom, Heather    | University at Buffalo                                                    |
| Okwuonu, Geoffrey       | Baylor College of Medicine Human Genome Sequencing Center                |
| Pack, Allan             | University of Pennsylvania                                               |
| Paik, David T.          | Stanford University                                                      |
| Palmer, Nicholette      | Wake Forest Baptist Health                                               |
| Pankow, James           | University of Minnesota                                                  |
| Papanicolaou, George    | National Heart, Lung, and Blood Institute, National Institutes of Health |
| Parker, Cora            | RTI International                                                        |
| Peloso, Gina            | Boston University                                                        |
| Peralta, Juan Manuel    | University of Texas Rio Grande Valley School of Medicine                 |
| Perez, Marco            | Stanford University                                                      |
| Perry, James            | University of Maryland                                                   |
| Peters, Ulrike          | Fred Hutchinson Cancer Research Center                                   |
| Peysner, Patricia       | University of Michigan                                                   |
| Phillips, Lawrence S    | Emory University                                                         |
| Pleiness, Jacob         | University of Michigan                                                   |
| Pollin, Toni            | University of Maryland                                                   |
| Post, Wendy             | Johns Hopkins University                                                 |
| Powers Becker, Julia    | University of Colorado at Denver                                         |
| Preethi Boorgula, Meher | University of Colorado at Denver                                         |
| Preuss, Michael         | Icahn School of Medicine at Mount Sinai                                  |
| Psaty, Bruce            | University of Washington                                                 |
| Qasba, Pankaj           | National Heart, Lung, and Blood Institute, National Institutes of Health |
| Qiao, Dandi             | Brigham & Women's Hospital                                               |

|                                |                                                                  |
|--------------------------------|------------------------------------------------------------------|
| Qin, Zhaohui                   | Emory University                                                 |
| Rafaels, Nicholas              | University of Colorado at Denver                                 |
| Raffield, Laura                | University of North Carolina                                     |
| Rajendran, Mahitha             | Baylor College of Medicine Human Genome Sequencing Center        |
| Ramachandran, Vasan S.         | Boston University                                                |
| Rao, D.C.                      | Washington University in St Louis                                |
| Rasmussen-Torvik, Laura        | Northwestern University                                          |
| Ratan, Aakrosh                 | University of Virginia                                           |
| Redline, Susan                 | Brigham & Women's Hospital                                       |
| Reed, Robert                   | University of Maryland                                           |
| Reeves, Catherine              | New York Genome Center                                           |
| Regan, Elizabeth               | National Jewish Health                                           |
| Reiner, Alex                   | Fred Hutchinson Cancer Research Center, University of Washington |
| Reupena, Muagututi,Äàa Sefuiva | Lutia I Puava Ae Mapu I Fagalele                                 |
| Rice, Ken                      | University of Washington                                         |
| Rich, Stephen                  | University of Virginia                                           |
| Robillard, Rebecca             | University of Ottawa                                             |
| Robine, Nicolas                | New York Genome Center                                           |
| Roden, Dan                     | Vanderbilt University                                            |
| Roselli, Carolina              | Broad Institute                                                  |
| Rotter, Jerome                 | Lundquist Institute                                              |
| Ruczinski, Ingo                | Johns Hopkins University                                         |
| Runnels, Alexi                 | New York Genome Center                                           |
| Russell, Pamela                | University of Colorado at Denver                                 |
| Ruuska, Sarah                  | Blood Works Northwest                                            |
| Ryan, Kathleen                 | University of Maryland                                           |
| Sabino, Ester Cerdeira         | Universidade de Sao Paulo                                        |
| Saleheen, Danish               | Columbia University                                              |
| Salimi, Shabnam                | University of Maryland                                           |

|                        |                                                           |
|------------------------|-----------------------------------------------------------|
| Salvi, Sejal           | Baylor College of Medicine Human Genome Sequencing Center |
| Salzberg, Steven       | Johns Hopkins University                                  |
| Sadow, Kevin           | Lundquist Institute                                       |
| Sankaran, Vijay G.     | Harvard University                                        |
| Santibanez, Jireh      | Baylor College of Medicine Human Genome Sequencing Center |
| Schwander, Karen       | Washington University in St Louis                         |
| Schwartz, David        | University of Colorado at Denver                          |
| Sciurba, Frank         | University of Pittsburgh                                  |
| Seidman, Christine     | Harvard Medical School                                    |
| Seidman, Jonathan      | Harvard Medical School                                    |
| Sv©riv®s, Frv©dv©ric   | Universitv© Laval                                         |
| Sheehan, Vivien        | Emory University                                          |
| Sherman, Stephanie L.  | Emory University                                          |
| Shetty, Amol           | University of Maryland                                    |
| Shetty, Aniket         | University of Colorado at Denver                          |
| Sheu, Wayne Hui-Heng   | Taichung Veterans General Hospital Taiwan                 |
| Shoemaker, M. Benjamin | Vanderbilt University                                     |
| Silver, Brian          | UMass Memorial Medical Center                             |
| Silverman, Edwin       | Brigham & Women's Hospital                                |
| Skomro, Robert         | University of Saskatchewan                                |
| Smith, Albert Vernon   | University of Michigan                                    |
| Smith, Jennifer        | University of Michigan                                    |
| Smith, Josh            | University of Washington                                  |
| Smith, Nicholas        | University of Washington                                  |
| Smith, Tanja           | New York Genome Center                                    |
| Smoller, Sylvia        | Albert Einstein College of Medicine                       |
| Snively, Beverly       | Wake Forest Baptist Health                                |
| Snyder, Michael        | Stanford University                                       |
| Sofer, Tamar           | Brigham & Women's Hospital                                |

|                      |                                                |
|----------------------|------------------------------------------------|
| Sotoodehnia, Nona    | University of Washington                       |
| Stilp, Adrienne M.   | University of Washington                       |
| Storm, Garrett       | University of Colorado at Denver               |
| Streeten, Elizabeth  | University of Maryland                         |
| Su, Jessica Lasky    | Brigham & Women's Hospital                     |
| Sung, Yun Ju         | Washington University in St Louis              |
| Sylvia, Jody         | Brigham & Women's Hospital                     |
| Szpiro, Adam         | University of Washington                       |
| Taliun, Daniel       | University of Michigan                         |
| Tang, Hua            | Stanford University                            |
| Taub, Margaret       | Johns Hopkins University                       |
| Taylor, Kent D.      | Lundquist Institute                            |
| Taylor, Matthew      | University of Colorado Anschutz Medical Campus |
| Taylor, Simeon       | University of Maryland                         |
| Telen, Marilyn       | Duke University                                |
| Thornton, Timothy A. | University of Washington                       |
| Threlkeld, Machiko   | University of Washington                       |
| Tinker, Lesley       | Fred Hutchinson Cancer Research Center         |
| Tirschwell, David    | University of Washington                       |
| Tishkoff, Sarah      | University of Pennsylvania                     |
| Tiwari, Hemant       | University of Alabama                          |
| Tong, Catherine      | University of Washington                       |
| Tracy, Russell       | University of Vermont                          |
| Tsai, Michael        | University of Minnesota                        |
| Vaidya, Dhananjay    | Johns Hopkins University                       |
| Van Den Berg, David  | University of Southern California              |
| VandeHaar, Peter     | University of Michigan                         |
| Vrieze, Scott        | University of Minnesota                        |
| Walker, Tarik        | University of Colorado at Denver               |

|                         |                                                           |
|-------------------------|-----------------------------------------------------------|
| Wallace, Robert         | University of Iowa                                        |
| Walts, Avram            | University of Colorado at Denver                          |
| Wang, Fei Fei           | University of Washington                                  |
| Wang, Heming            | Brigham & Women's Hospital, Mass General Brigham          |
| Wang, Jiongming         | University of Michigan                                    |
| Watson, Karol           | University of California, Los Angeles                     |
| Watt, Jennifer          | Baylor College of Medicine Human Genome Sequencing Center |
| Weeks, Daniel E.        | University of Pittsburgh                                  |
| Weinstock, Joshua       | University of Michigan                                    |
| Weir, Bruce             | University of Washington                                  |
| Weiss, Scott T          | Brigham & Women's Hospital                                |
| Weng, Lu-Chen           | Massachusetts General Hospital                            |
| Wessel, Jennifer        | Indiana University                                        |
| Willer, Cristen         | University of Michigan                                    |
| Williams, Kayleen       | University of Washington                                  |
| Williams, L. Keoki      | Henry Ford Health System                                  |
| Wilson, Carla           | Brigham & Women's Hospital                                |
| Wilson, James           | Beth Israel Deaconess Medical Center                      |
| Winterkorn, Lara        | New York Genome Center                                    |
| Wong, Quenna            | University of Washington                                  |
| Wu, Joseph              | Stanford University                                       |
| Xu, Huichun             | University of Maryland                                    |
| Yanek, Lisa             | Johns Hopkins University                                  |
| Yang, Ivana             | University of Colorado at Denver                          |
| Yu, Ketian              | University of Michigan                                    |
| Zekavat, Seyedeh Maryam | Broad Institute                                           |
| Zhang, Yingze           | University of Pittsburgh                                  |
| Zhao, Snow Xueyan       | National Jewish Health                                    |
| Zhao, Wei               | University of Michigan                                    |

Zhu, Xiaofeng  
Zody, Michael  
Zoellner, Sebastian

Case Western Reserve University  
New York Genome Center  
University of Michigan
